# Supplementary material
Source: HighWire-hosted journal article supplement (https://bmjopen.bmj.com/content/11/10/e046346)
Supplement: inline-supplementary-material-2 [file inline-supplementary-material-2.pdf]

Treatment week: \_\_\_\_\_

Patient: \_\_\_\_\_ ID: \_\_\_\_\_ Date Start Rehab \_\_\_/\_\_\_/\_\_\_

| ST        | Activity                                                               | Session n°__ |
|-----------|------------------------------------------------------------------------|--------------|--------------|--------------|--------------|--------------|
| Date      |                                                                        |              |              |              |              |              |
| Therapist |                                                                        |              |              |              |              |              |
|           | Verbal and written comprehension                                       | Time         | Time         | Time         | Time         | Time         |
|           | Oral production (articulation, volume, tone, prosody)                  | Time         | Time         | Time         | Time         | Time         |
|           | Phonological processing                                                | Time         | Time         | Time         | Time         | Time         |
|           | Morfo-synthaxis exercises                                              | Time         | Time         | Time         | Time         | Time         |
|           | Functional Communication                                               | Time         | Time         | Time         | Time         | Time         |
|           | Lexical evocation (free, phonetic-phonological and semantic evocation) | Time         | Time         | Time         | Time         | Time         |
|           | Lingual praxis                                                         | Time         | Time         | Time         | Time         | Time         |
|           | Cognition (memory, reasoning, logical reasoning , abstraction)         | Time         | Time         | Time         | Time         | Time         |
|           | Respiratory Muscle Training (Orygen-Dual Valve)                        | Time         | Time         | Time         | Time         | Time         |
|           | Sensitive and gustatory stimulation                                    | Time         | Time         | Time         | Time         | Time         |
|           | NMES (Vital Stym)                                                      | Time         | Time         | Time         | Time         | Time         |
| TOTAL     |                                                                        |              |              |              |              |              |
| OBS       |                                                                        |              |              |              |              |              |
